# Supplementary material for: Multivariate joint modeling to identify markers of growth and lung function decline that predict cystic fibrosis pulmonary exacerbation onset
Source: PubMed Central journal article supplement (PMC7236487; doi:10.1186/s12890-020-1177-z), 2020-05-19
Supplement: 12890_2020_1177_MOESM2_ESM.pdf [file 12890_2020_1177_MOESM2_ESM.pdf]

```

#####
# Additional File 2 #
# Supplemental Material #
# Multivariate joint modeling to identify markers of growth and #
# lung function decline that predict cystic fibrosis pulmonary #
# exacerbation onset #
# Andrinopoulou, E.R., Clancy, J.P., & Szczesniak, R.D. #
#####

#####
# load packages #
#####

library(JMbayes)

#####
# data set #
#####

## The data set is called data

## Order the data set by id and time

### eDWID: id number
data <- data[order(data$age, data$age ), ]

## Data set for the Cox model (last measurement per patient)

data.id <- data[tapply(row.names(data), data$eDWID, tail, 1), ]

## Split data set in 3 parts - ID is the identity number of each patient

## Same random split every time
set.seed(122017)

V <- 3 # split the data in 3 parts
n <- nrow(data.id)

splits <- split(data.id$ID, sample(rep(seq_len(V), length.out = n)))

data1 <- data[data$ID %in% splits$`1`, ]
data1.id <- data1[tapply(row.names(data1), data1$ID, tail, 1), ]

data2 <- data[data$ID %in% splits$`2`, ]
data2.id <- data2[tapply(row.names(data2), data2$ID, tail, 1), ]

data3 <- data[data$ID %in% splits$`3`, ]
data3.id <- data3[tapply(row.names(data3), data3$ID, tail, 1), ]

#####
# Models #
#####

### eDWID: id number
### fev outcome: FEV1
### bmipct outcome: BMI percentile
### age covariate
### F508_c covariate: Delta F508 gene (Homozygous/Heterozygous/Neither)

```

```

### Gender covariate
### HispanicRace covariate: yes/no
### SESlow covariate: Using state/federal or having no insurance is a
### marker of low socioeconomic status (Yes/No)
### bcohr covariate: Birth cohort for year patient was born, used to
### adjust for changes in standards of care and possible
### left truncation (1981-1988/1988-1994/After 1994)
### MRSA covariate: Methicillin-resistant Staphylococcus aureus (Yes/No)
### pa covariate: Pseudomonas aeruginosa (Yes/No)
### cfrd covariate: CF-related diabetes (Normal/Impaired/CFRD with
### or without fasting hyperglycemia)
### isOnEnzymes covariate: Taking a pancreatic enzyme supplement, marks
### pancreatic insufficiency (Yes/No)
### numVisityr covariate: Rolling total of number of visits within the
### year. Used to account for irregular
### follow up between patients
### pel survival outcome: occurrence of first recorded pulmonary
### exacerbation (Occurred/Not occurred)

## 1st subset

### Multivariate mixed-effects model

MixedModelFit1 <- mvglmer(list(fev ~ ns(age,3)*F508_c +
                             ns(age,3)*Gender +
                             ns(age,3)*HispanicRace +
                             ns(age,3)*SESlow +
                             ns(age,3)*bcohr + ns(age,3)*MRSA +
                             ns(age,3)*pa + ns(age,3)*cfrd +
                             ns(age,3)*isOnEnzymes +
                             ns(age,3)*numVisityr +
                             (ns(age,3) | eDWID),
                             bmipct ~ ns(age,3)*F508_c +
                             ns(age,3)*Gender +
                             ns(age,3)*HispanicRace +
                             ns(age,3)*SESlow +
                             ns(age,3)*bcohr + ns(age,3)*MRSA +
                             ns(age,3)*pa + ns(age,3)*cfrd +
                             ns(age,3)*isOnEnzymes +
                             ns(age,3)*numVisityr +
                             (ns(age,3) | eDWID)), engine = c("JAGS"),
                             data = data1,
                             families = list(gaussian, gaussian))

### Cox model
CoxFit1 <- coxph(Surv(age, pel) ~ SESlow + Gender + isOnEnzymes +
                 pa + MRSA + cfrd,
                 data = data1.id, model = TRUE)

### Joint model
JMFitBMI1 <- mvJointModelBayes(MixedModelFit1, CoxFit1, timeVar = "age")
summary(JMFitBMI1)

JM1 <- JMFitBMI1$mcmc

## 2nd subset

### Multivariate mixed-effects model

MixedModelFit2 <- mvglmer(list(fev ~ ns(age,3)*F508_c +

```

```

        ns(age,3)*Gender +
        ns(age,3)*HispanicRace +
        ns(age,3)*SESlow +
        ns(age,3)*bcohr + ns(age,3)*MRSA +
        ns(age,3)*pa + ns(age,3)*cfrd +
        ns(age,3)*isOnEnzymes +
        ns(age,3)*numVisityr +
        (ns(age,3) | eDWID),
    bmipct ~ ns(age,3)*F508_c +
        ns(age,3)*Gender +
        ns(age,3)*HispanicRace +
        ns(age,3)*SESlow +
        ns(age,3)*bcohr + ns(age,3)*MRSA +
        ns(age,3)*pa + ns(age,3)*cfrd +
        ns(age,3)*isOnEnzymes +
        ns(age,3)*numVisityr +
        (ns(age,3) | eDWID)), engine = c("JAGS"),
    data = data2,
    families = list(gaussian, gaussian))

```

```
### Cox model
```

```

CoxFit2 <- coxph(Surv(age, pel) ~ SESlow + Gender + isOnEnzymes +
    pa + MRSA + cfrd,
    data = data2.id, model = TRUE)

```

```
### Joint model
```

```

JMFitBMI2 <- mvJointModelBayes(MixedModelFit2, CoxFit2, timeVar = "age")
summary(JMFitBMI2)

```

```
JM2 <- JMFitBMI2$mcmc
```

```
## 3rd subset
```

```
### Multivariate mixed-effects model
```

```

MixedModelFit3 <- mvglmer(list(fev ~ ns(age,3)*F508_c +
    ns(age,3)*Gender +
    ns(age,3)*HispanicRace +
    ns(age,3)*SESlow +
    ns(age,3)*bcohr + ns(age,3)*MRSA +
    ns(age,3)*pa + ns(age,3)*cfrd +
    ns(age,3)*isOnEnzymes +
    ns(age,3)*numVisityr +
    (ns(age,3) | eDWID),
    bmipct ~ns(age,3)*F508_c +
        ns(age,3)*Gender +
        ns(age,3)*HispanicRace +
        ns(age,3)*SESlow +
        ns(age,3)*bcohr + ns(age,3)*MRSA +
        ns(age,3)*pa + ns(age,3)*cfrd +
        ns(age,3)*isOnEnzymes +
        ns(age,3)*numVisityr +
        (ns(age,3) | eDWID)), engine = c("JAGS"),
    data = data3,
    families = list(gaussian, gaussian))

```

```
### Cox model
```

```

CoxFit3 <- coxph(Surv(age, pel) ~ SESlow + Gender + isOnEnzymes +
                pa + MRSA + cfrd,
                data = data3.id, model = TRUE)

### Joint model

JMFitBMI3 <- mvJointModelBayes(MixedModelFit3, CoxFit3, timeVar = "age")
summary(JMFitBMI3)

JM3 <- JMFitBMI3$mcmc

#####
# Predictions for the univariate joint model #
#####

## Fit a model

### Univariate mixed-effects model

MixedModelFit1 <- mvglmer(list(fev ~ ns(age,3)*F508_c +
                              ns(age,3)*Gender +
                              ns(age,3)*HispanicRace +
                              ns(age,3)*SESlow +
                              ns(age,3)*bcohr + ns(age,3)*MRSA +
                              ns(age,3)*pa + ns(age,3)*cfrd +
                              ns(age,3)*isOnEnzymes +
                              ns(age,3)*numVisityr +
                              (ns(age,3) | eDWID)), engine = c("JAGS"),
                          data = data1,
                          families = list(gaussian))

### Cox model

CoxFit1 <- coxph(Surv(age, pel) ~ SESlow + Gender + isOnEnzymes +
                pa + MRSA + cfrd,
                data = data1.id, model = TRUE)

### Joint model

JMFitBMI1 <- mvJointModelBayes(MixedModelFit1, CoxFit1, timeVar = "age")

## Select patient

newdata <- data[data$eDWID %in% unique(data$eDWID)[c(4)],]
newdata <- newdata[order(newdata$age), ]

## Obtain predictions

survPreds <- vector("list", nrow(newdata))
for (i in 1:nrow(newdata)) {
  survPreds[[i]] <- survfitJM(object = JMFitBMI1, newdata = newdata[1:i, ],
                             idVar = "eDWID")
}

## Obtain AUC

auc1 <- aucJM(JMFitBMI1, newdata = newdata, idVar = "eDWID",
              Tstart = 6, Thoriz = 6.5)

```

```

# Cross-validation procedure

CrossValJM <- function(j){
  # load packages
  library("JMbayes")
  library("splines")

  # training data set
  trainingData <- data[!data$eDWID %in% j, ]
  # training data set: last observation per patient
  trainingData.id <- trainingData[!duplicated(trainingData$eDWID), ]
  # testing dataset for prediction
  testingData <- data[data$eDWID %in% j, ]

  # fit mixed model on training data set
  MixedModelFit <- mvglmer(list(fev ~ ns(age,3)*F508_c + ns(age,3)*Gender +
    ns(age,3)*HispanicRace +
    ns(age,3)*SESslow +
    ns(age,3)*bcohr + ns(age,3)*MRSA +
    ns(age,3)*pa + ns(age,3)*cfrd +
    ns(age,3)*isOnEnzymes +
    ns(age,3)*numVisityr +
    (ns(age,3) | eDWID)), engine = c("JAGS"),
    data = trainingData,
    families = list(gaussian))

  # fit cox model on training data set
  CoxFit <- coxph(Surv(age + 0.1, pe1) ~ SESslow + Gender + isOnEnzymes +
    pa + MRSA + cfrd,
    data = trainingData.id, model = TRUE)

  # fit joint model on training data set
  JMFitBMI <- mvJointModelBayes(MixedModelFit, CoxFit, timeVar = "age")

  # obtain auc on testing data set
  auc1 <- aucJM(JMFitBMI, newdata = testingData, idVar = "eDWID",
    Tstart = 6, Thoriz = 6.5)
  auc2 <- aucJM(JMFitBMI, newdata = testingData, idVar = "eDWID",
    Tstart = 6, Thoriz = 7)
  auc3 <- aucJM(JMFitBMI, newdata = testingData, idVar = "eDWID",
    Tstart = 6, Thoriz = 8)
  auc4 <- aucJM(JMFitBMI, newdata = testingData, idVar = "eDWID",
    Tstart = 12, Thoriz = 12.5)
  auc5 <- aucJM(JMFitBMI, newdata = testingData, idVar = "eDWID",
    Tstart = 12, Thoriz = 13)
  auc6 <- aucJM(JMFitBMI, newdata = testingData, idVar = "eDWID",
    Tstart = 12, Thoriz = 14)
  auc7 <- aucJM(JMFitBMI, newdata = testingData, idVar = "eDWID",
    Tstart = 16, Thoriz = 16.5)
  auc8 <- aucJM(JMFitBMI, newdata = testingData, idVar = "eDWID",
    Tstart = 16, Thoriz = 17)
  auc9 <- aucJM(JMFitBMI, newdata = testingData, idVar = "eDWID",
    Tstart = 16, Thoriz = 18)

  # merge results in a list
  list(auc1 = auc1, auc2 = auc2, auc3 = auc3,
    auc4 = auc4, auc5 = auc5, auc6 = auc6,
    auc7 = auc7, auc8 = auc8, auc9 = auc9)
}

```
